# Supplementary material for: Genome-wide transcriptional response of Trichoderma reesei to lignocellulose using RNA sequencing and comparison with Aspergillus niger
Source: PubMed Central journal article supplement (PMC3750697; doi:10.1186/1471-2164-14-541), 2013-08-09

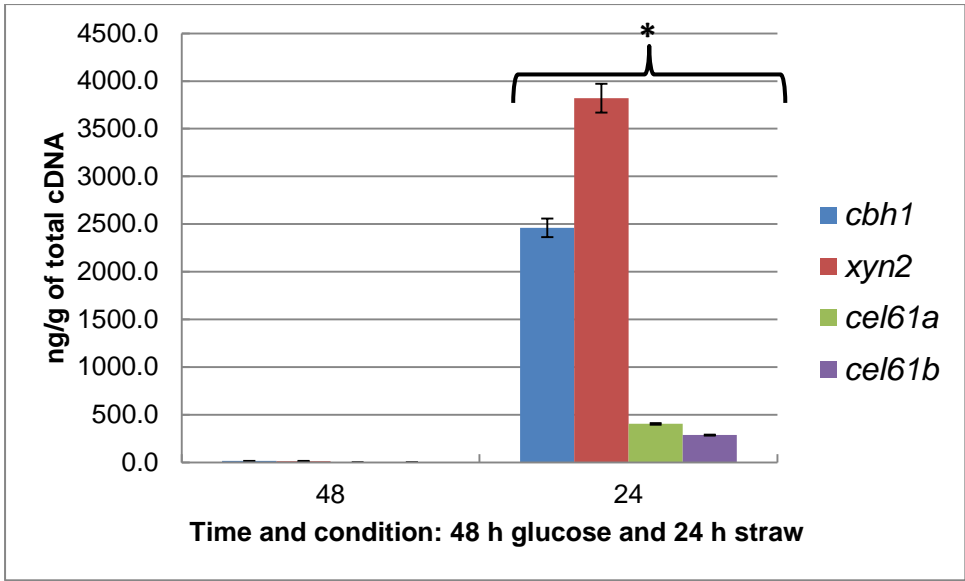

Supplement: 1471-2164-14-541-S2.pdf [file 1471-2164-14-541-S2.pdf]
